# Supplementary material for: A Dawson-type {P4W24} modified using phenylphosphonic acid with excellent proton conductivity
Source: Royal Society of Chemistry journal article supplement (doi:10.1039/d4dt01775g), 2024-01-01
Supplement: d4dt01775g1.pdf [file d4dt01775g1.pdf]

# A Dawson-type $\{P_4W_{24}\}$ modified by phenylphosphonic acid with excellent proton conductivity

Jiayu Liu, Wenjing Lei, Shihao Zhang, Huafeng Li, Siyu Liu, Pengtao Ma, Jingping Wang\*  
and Jingyang Niu\*

Henan Key Laboratory of Polyoxometalate Chemistry, College of Chemical and Molecular Sciences, Henan University, Kaifeng, Henan 475004, P. R. China

## Contents

### Proton conduction experiments

**Section 1.** The ball-and-stick representation of  $[P_2W_{12}O_{48}PhPO]^{14-}$ .

**Section 2.** The polyhedral/ball-and-stick representation internal star-shaped cavity  $\{W_8Co_2O_{58}\}^{64-}$  of **1**.

**Section 3.** The polyhedral/ball-and-stick representation of  $[\alpha-H_2P_2W_{12}O_{48}]^{12-}$  unit.

**Section 4.** The dihedral angle in the  $\{P_4W_{24}\}$  fragment is  $38.018^\circ$ .

**Section 5.** The coordination environment of the anion center K1.

**Section 6.** The 3D structure of **1** linked by  $K^+$ .

**Section 7.** The IR of compound **1**, phenylphosphonic acid and  $\{P_2W_{12}\}$ .

**Section 8.** The experimental, and simulated PXRD patterns of **1**.

**Section 9.** The TGA curves of compound **1**.

**Section 10.** (a) The UV spectrum of compound **1**. (b) The K-M function of **1**.

**Section 11.** Water adsorption isotherm of compound **1**.

**Table S1.** Summary of proton conductive crystals based on POMs.

**Table S2.** BVS values of W, P, and Co atoms of compound **1**.

**Table S3.** Crystallographic data of compounds **1**.

**Table S4.** Bond length of compound **1**.

**Table S5.** Angle length of compound **1**.

**Proton conduction experiments:**

Firstly, the single crystals were uniformly ground into powder and then were put into a homemade mold with a radius of 3 mm to obtain circular pellets. And the thicknesses of the compound **1** was measured by a vernier caliper with 0.054 cm, respectively. Secondly, both sides of the pellets were coated with silver glue and dried naturally in air. And last, the pellets were fixed on the sample stage with gold wires. AC impedance measurements were performed on Solartron Analytical ModuLab 1260/1296 over the frequency ranging from 1 Hz to 10 MHz. The relative humidity was controlled by a STIK Corp CIHI-150BS3 incubator. Two silver electrodes were attached to both sides of the pellet to form four end terminals (quasi-fourprobe method). The measurements were carried out for 2 h at each testing temperature or RH. The ZsimpWin software was used to fit the equivalent circuit of the impedance data. The proton conductivity ( $\sigma$ ) and activation energy ( $Ea$ ) were calculated by the two following equations:

$$\sigma = L/RS \quad (1)$$

$$\ln \sigma T = \ln A - Ea/(K_b T) \quad (2)$$

where  $L$  is the thickness (cm) of the slice,  $S$  is the electrode area (cm<sup>2</sup>),  $R$  is the resistance ( $\Omega$ ),  $A$  is the pre-exponential factor,  $T$  represents the absolute temperature, and  $K_b$  is the Boltzmann constant ( $K_b = 8.63 \times 10^{-5}$  eV/K).

## Figures

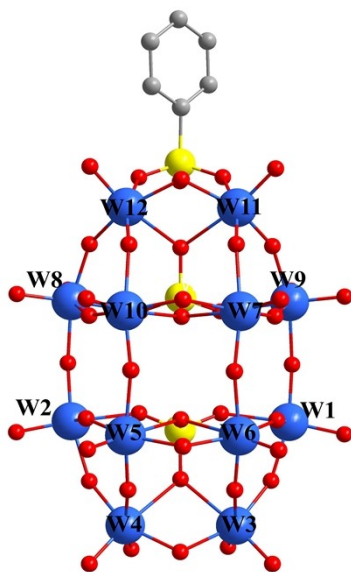

Fig. S1. The ball-and-stick representation of [P<sub>2</sub>W<sub>12</sub>O<sub>48</sub>PhPO]<sup>14-</sup>.

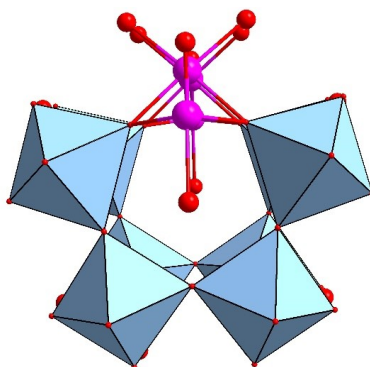

Fig. S2. The polyhedral/ ball-and-stick representation internal star-shaped cavity {W<sub>8</sub>Co<sub>2</sub>O<sub>58</sub>}<sup>64-</sup> of **1**.

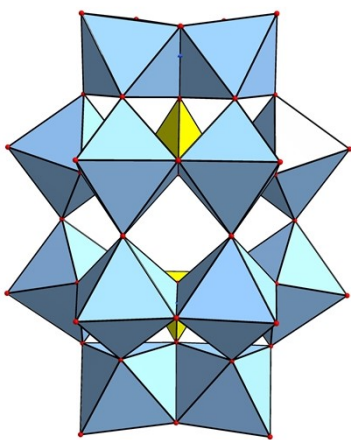

Fig. S3. The polyhedral/ball-and-stick representation of [α-H<sub>2</sub>P<sub>2</sub>W<sub>12</sub>O<sub>48</sub>]<sup>12-</sup> unit.

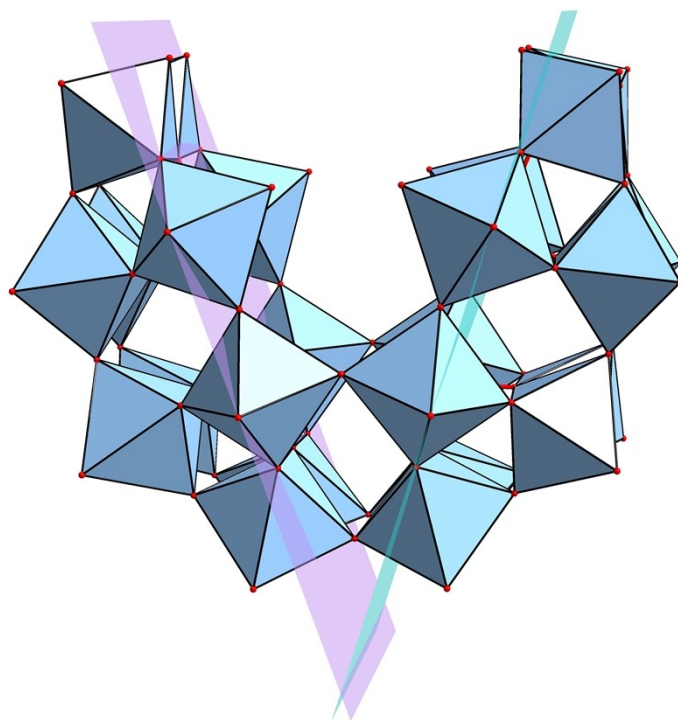

Fig. S4. The dihedral angle in the  $\{P_4W_{24}\}$  fragment is  $38.018^\circ$ .

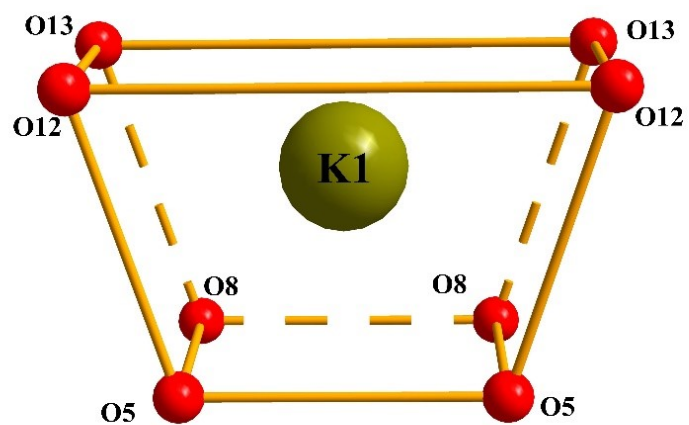

Fig. S5. The coordination environment of the anion center K1.

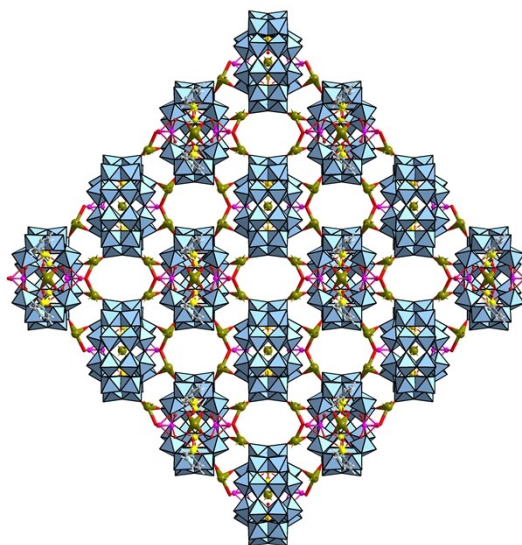

Fig. S6. The 3D structure of **1** linked by  $K^+$ .

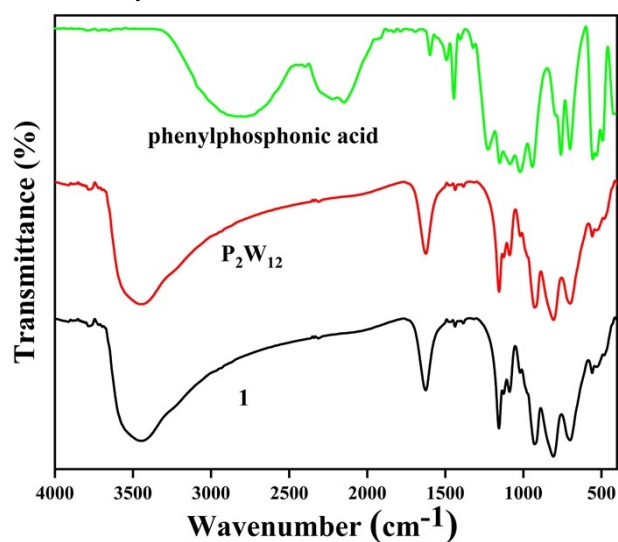

Fig. S7. The IR of compound **1**, phenylphosphonic acid and  $\{P_2W_{12}\}$ .

As shown in Fig. S7, the IR spectrum of compound **1** has distinct characteristic vibrational peaks in the region of  $4000\text{ cm}^{-1} \sim 400\text{ cm}^{-1}$ . The peaks at  $968$  and  $928\text{ cm}^{-1}$  belong to the W–Ot terminal vibration, and the peak at  $831\text{ cm}^{-1}$  are associated with W–O bridges vibrations.<sup>S1</sup> The P–O vibrational bands in **1** appear at  $1157$ ,  $1127$ , and  $1022\text{ cm}^{-1}$ , in comparison with the P–O vibration bands of phenylphosphonic acid molecules at  $1132$ ,  $1129$  and  $1029\text{ cm}^{-1}$ , which shows red shifts.<sup>S2</sup> The result suggests that the phenylphosphonic acid ligands are coordinated to the metal ions by means of the oxygen atoms.

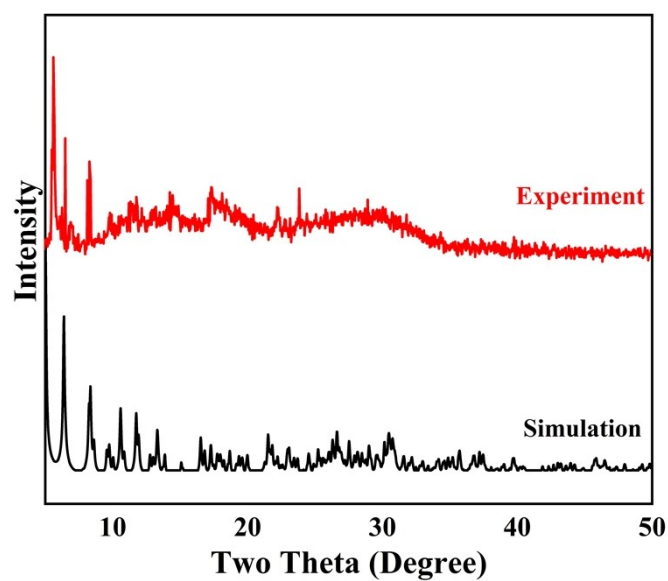

Fig. S8. The experimental, and simulated PXRD patterns of **1**.

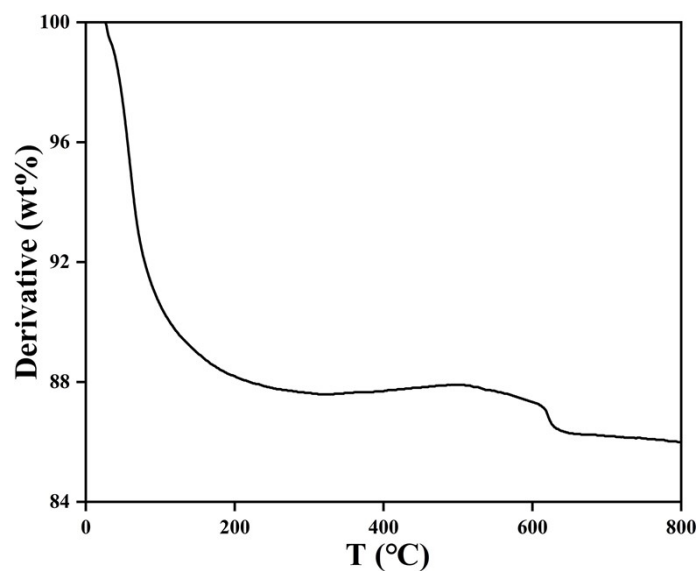

Fig. S9. The TGA curves of compound **1**.

The TGA curves of compound **1** have been determined in the range of 25 ~ 800 °C under the protection of N<sub>2</sub>. The TGA curves for **1** exhibits two discrete stages of mass loss. From 30 °C to 200 °C, the first weight loss of 12.44% was due to the loss of 48 crystalline water molecules. The weight loss observed in the second step, which occurred at 200 ~ 800 °C, was mainly due to the escape of 10 coordinated water molecules and 2 phenylphosphonic acid ligands.

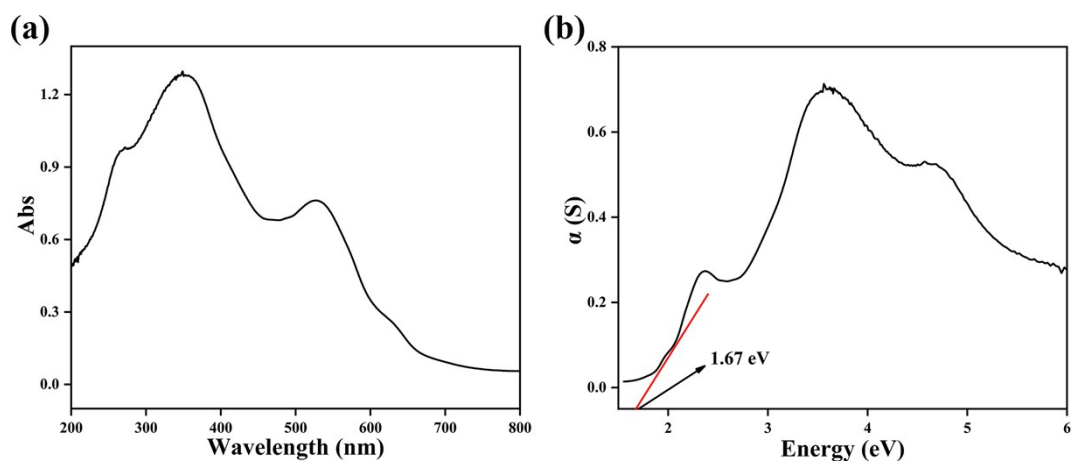

**Fig. S10.** (a) The UV spectrum of compound **1**. (b) The K-M function of **1**.

Within the scope of 200–800 nm, UV analyse was performed on solid samples. In Fig. S10., **1** shows three absorption analogy bands at 268, 348, and 527 nm. The strong absorption peaks at 268 and 348 nm belong to the charge transfer from the ligand to the tungsten metal. The absorption peak at 527 nm corresponds to the d-d transition of the tungsten ion. The band gap energy of compound **1** was calculated from the Kubelka-Munk equation to be 1.67 eV, suggesting that it has potential semiconducting properties.

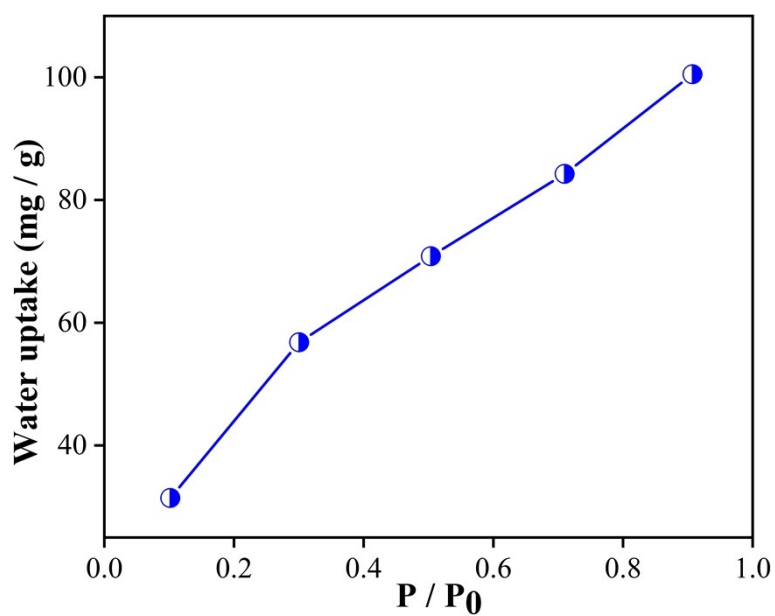

**Fig. S11.** Water adsorption isotherm of compound **1**.

## Tables

**Table S1.** Summary of proton conductive crystals based on POMs.

| Compounds                                                                                                                                                                                                                                                                     | Conductivity (S cm <sup>-1</sup> ) | Temperature (K) | Relative humidity (%) | Reference        |
|-------------------------------------------------------------------------------------------------------------------------------------------------------------------------------------------------------------------------------------------------------------------------------|------------------------------------|-----------------|-----------------------|------------------|
| K <sub>4</sub> Na <sub>4</sub> H <sub>11</sub> [KCo <sub>2</sub> (H <sub>2</sub> O) <sub>10</sub> P <sub>4</sub> W <sub>24</sub> O <sub>92</sub> {(PhPO) <sub>2</sub> }]·48H <sub>2</sub> O                                                                                   | 1.59 × 10 <sup>-2</sup>            | 318             | 95                    | <b>This work</b> |
| [Ni <sub>8</sub> (OH) <sub>4</sub> (H <sub>2</sub> O) <sub>2</sub> (BDPCOOH) <sub>6</sub> ]                                                                                                                                                                                   | 2.22 × 10 <sup>-3</sup>            | 353             | 100                   | S3               |
| [Cu(en) <sub>2</sub> (H <sub>2</sub> O)] <sub>2</sub> {[Cu(en)] <sub>4</sub> [Cu(en) <sub>2</sub> ] <sub>5</sub> {[Cu(en) <sub>2</sub> KNb <sub>24</sub> O <sub>72</sub> H <sub>10</sub> ] <sub>2</sub> }·6en·70H <sub>2</sub> O                                              | 1.35 × 10 <sup>-3</sup>            | 358             | 98                    | S4               |
| [H <sub>2</sub> N(CH <sub>3</sub> ) <sub>2</sub> ] <sub>8</sub> {[Na(H <sub>2</sub> O) <sub>4</sub> ]NaAs <sub>2</sub> W <sub>22</sub> (CH <sub>3</sub> COO) <sub>2</sub> O <sub>76</sub> Rh <sub>2</sub> (N(CH <sub>3</sub> ) <sub>2</sub> ) <sub>2</sub> }·H <sub>2</sub> O | 3.23 × 10 <sup>-4</sup>            | 338             | 80                    | S5               |
| [Cu <sub>3</sub> (μ <sub>3</sub> -OH)(H <sub>2</sub> O) <sub>3</sub> (atz) <sub>3</sub> ] <sub>3</sub><br>[P <sub>2</sub> W <sub>18</sub> O <sub>62</sub> ]·14H <sub>2</sub> O                                                                                                | 4.42 × 10 <sup>-6</sup>            | 298             | 97                    | S6               |
| [H <sub>2</sub> en] <sub>4</sub> [Ni <sub>5</sub> (OH) <sub>3</sub> (trzS) <sub>3</sub> (en)(H <sub>2</sub> O)(B-α-PW <sub>9</sub> O <sub>34</sub> )]·6H <sub>2</sub> O                                                                                                       | 1.30 × 10 <sup>-5</sup>            | 358             | 98                    | S7               |
| Cu <sub>6</sub> (Trz) <sub>10</sub> (H <sub>2</sub> O) <sub>4</sub> [H <sub>2</sub> SiW <sub>12</sub> O <sub>40</sub> ]·8H <sub>2</sub> O                                                                                                                                     | 1.84 × 10 <sup>-6</sup>            | 368             | 95                    | S8               |
| [Cu(debqdc) <sub>2</sub> ] <sub>2</sub> [HPW <sub>12</sub> O <sub>40</sub> ]·4H <sub>2</sub> O                                                                                                                                                                                | 3.23 × 10 <sup>-4</sup>            | 373             | 98                    | S9               |
| Na <sub>2</sub> [Gd <sub>2</sub> (H <sub>2</sub> O) <sub>11</sub> ] <sub>2</sub> [Gd <sub>3</sub> (H <sub>2</sub> O) <sub>2</sub> (α-SiW <sub>11</sub> O <sub>39</sub> ) <sub>2</sub> ] <sub>2</sub> ·69H <sub>2</sub> O                                                      | 3.54 × 10 <sup>-3</sup>            | 358             | 98                    | S10              |
| [Ce <sup>III</sup> (H <sub>2</sub> O) <sub>6</sub> ]{[Ce <sup>IV</sup> <sub>7</sub> Ce <sup>III</sup> <sub>3</sub> O <sub>6</sub> (OH) <sub>6</sub> (CO <sub>3</sub> )(H <sub>2</sub> O) <sub>11</sub> ][P <sub>2</sub> W <sub>16</sub> O <sub>59</sub> ] <sub>3</sub> }      | 2.65 × 10 <sup>-4</sup>            | 373             | 75                    | S11              |
| Na <sub>5.5</sub> H <sub>6.5</sub> [(SbW <sub>9</sub> O <sub>33</sub> ) <sub>2</sub> {WO <sub>2</sub> (OH)} <sub>2</sub> {WO <sub>2</sub> }<br>RuC <sub>7</sub> H <sub>3</sub> NO <sub>4</sub> ]·36H <sub>2</sub> O                                                           | 2.97 × 10 <sup>-2</sup>            | 348             | 75                    | S12              |

**Table S2.** Bond Valence Sum (BVS) calculations of all the Co, P and W atoms in **1**.

| Bond                 | Bond length | Bond Valence | Bond                 | Bond length | Bond Valence |
|----------------------|-------------|--------------|----------------------|-------------|--------------|
| Co1-O1W <sup>1</sup> | 2.078(18)   | 0.352        | Co2-O4W <sup>1</sup> | 2.105(18)   | 0.328        |
| Co1-O1W              | 2.078(18)   | 0.352        | Co2-O4W              | 2.105(18)   | 0.328        |
| Co1-O2W              | 2.02(3)     | 0.412        | Co2-O5W              | 2.04(3)     | 0.390        |
| Co1-O10              | 2.005(15)   | 0.429        | Co2-O251             | 2.039(16)   | 0.391        |
| Co1-O10 <sup>1</sup> | 2.005(15)   | 0.429        | Co2-O25              | 2.039(16)   | 0.391        |
| Σ(Co1) = 1.975       |             |              | Σ(Co2) = 1.828       |             |              |
| P1-O5                | 1.516(13)   | 1.269        | P2-O12               | 1.509(13)   | 1.293        |
| P1-O8                | 1.526(12)   | 1.235        | P2-O13               | 1.513(12)   | 1.279        |
| P1-O9                | 1.547(15)   | 1.167        | P2-O20               | 1.535(14)   | 1.205        |
| P1-O24               | 1.523(13)   | 1.245        | P2-O39               | 1.579(15)   | 1.070        |
| Σ(P1) = 4.914        |             |              | Σ(P2) = 4.864        |             |              |
| P3-O30               | 1.549(16)   | 1.160        | P4-O1                | 1.512(5)    | 1.282        |
| P3-O32               | 1.565(18)   | 1.111        | P4-O15               | 1.529(5)    | 1.225        |
| P3-O48               | 1.544(15)   | 1.176        | P4-O21               | 1.552(6)    | 1.151        |
| P3-C1                | 1.78(2)     | 0.932        | P4-C2                | 1.849(8)    | 1.117        |
| Σ(P3) = 4.380        |             |              | Σ(P4) = 4.775        |             |              |



|                       |           |       |                       |           |       |
|-----------------------|-----------|-------|-----------------------|-----------|-------|
| W1-O7                 | 1.823(16) | 1.303 | W2-O2                 | 1.847(14) | 1.221 |
| W1-O8                 | 2.128(13) | 0.572 | W2-O3                 | 1.968(12) | 0.881 |
| W1-O14                | 1.936(13) | 0.960 | W2-O5                 | 2.127(11) | 0.573 |
| W1-O18                | 1.749(13) | 1.592 | W2-O28                | 1.731(12) | 1.671 |
| W1-O35                | 1.934(11) | 0.965 | W2-O31                | 1.954(12) | 0.915 |
| W1-O40                | 1.910(4)  | 1.030 | W2-O41                | 1.909(4)  | 1.033 |
| $\Sigma(W1) = 6.422$  |           |       | $\Sigma(W2) = 6.294$  |           |       |
| W3-O9                 | 2.298(13) | 0.361 | W4-O3                 | 1.877(12) | 1.126 |
| W3-O14                | 1.896(11) | 1.070 | W4-O9                 | 2.310(12) | 0.349 |
| W3-O21                | 1.948(14) | 0.930 | W4-O19                | 1.945(13) | 0.937 |
| W3-O26                | 1.701(16) | 1.812 | W4-O23                | 1.710(14) | 1.769 |
| W3-O27                | 1.934(13) | 0.965 | W4-O27                | 1.910(13) | 1.030 |
| W3-O42                | 1.904(3)  | 1.047 | W4-O50                | 1.920(6)  | 1.003 |
| $\Sigma(W3) = 6.185$  |           |       | $\Sigma(W4) = 6.215$  |           |       |
| W5-O6                 | 2.013(16) | 0.780 | W6-O4                 | 1.987(16) | 0.837 |
| W5-O11                | 1.934(12) | 0.965 | W6-O11                | 1.943(12) | 0.942 |
| W5-O19                | 1.865(15) | 1.163 | W6-O21                | 1.865(15) | 1.163 |
| W5-O24                | 2.277(11) | 0.382 | W6-O24                | 2.303(12) | 0.356 |
| W5-O31                | 1.899(13) | 1.061 | W6-O34                | 1.727(14) | 1.689 |
| W5-O46                | 1.725(14) | 1.698 | W6-O35                | 1.905(11) | 1.044 |
| $\Sigma(W5) = 6.051$  |           |       | $\Sigma(W6) = 6.032$  |           |       |
| W7-O4                 | 1.838(16) | 1.251 | W8-O2                 | 1.960(14) | 0.900 |
| W7-O15                | 1.954(12) | 0.915 | W8-O10                | 1.808(14) | 1.357 |
| W7-O17                | 1.832(12) | 1.272 | W8-O12                | 2.169(12) | 0.512 |
| W7-O20                | 2.307(12) | 0.352 | W8-O16                | 2.116(14) | 0.590 |
| W7-O33                | 2.10(2)   | 0.616 | W8-O36                | 1.939(16) | 0.953 |
| W7-O45                | 1.721(12) | 1.717 | W8-O37                | 1.732(13) | 1.667 |
| $\Sigma(W7) = 6.124$  |           |       | $\Sigma(W8) = 5.978$  |           |       |
| W9-O7                 | 1.984(16) | 0.843 | W10-O6                | 1.807(16) | 1.361 |
| W9-O13                | 2.157(11) | 0.528 | W10-O15               | 1.928(12) | 0.981 |
| W9-O17                | 2.096(13) | 0.623 | W10-O16               | 1.812(13) | 1.343 |
| W9-O25                | 1.779(14) | 1.468 | W10-O20               | 2.299(12) | 0.360 |
| W9-O29                | 1.914(17) | 1.019 | W10-O22               | 2.08(2)   | 0.651 |
| W9-O38                | 1.733(13) | 1.662 | W10-O43               | 1.748(13) | 1.596 |
| $\Sigma(W9) = 6.144$  |           |       | $\Sigma(W10) = 6.291$ |           |       |
| W11-O29               | 1.914(15) | 1.019 | W12-O22               | 1.81(2)   | 1.350 |
| W11-O32               | 2.049(18) | 0.708 | W12-O30               | 2.050(17) | 0.706 |
| W11-O33               | 1.78(2)   | 1.464 | W12-O36               | 1.899(14) | 1.061 |
| W11-O39               | 2.274(14) | 0.385 | W12-O39               | 2.263(12) | 0.397 |
| W11-O44               | 1.975(19) | 0.864 | W12-O44               | 1.929(16) | 0.979 |
| W11-O51               | 1.733(16) | 1.662 | W12-O47               | 1.718(16) | 1.731 |
| $\Sigma(W11) = 6.102$ |           |       | $\Sigma(W12) = 6.233$ |           |       |

**Table S3.** Crystallographic data of compound **1**.

---

| Compound                                   | <b>1</b>                                     |
|--------------------------------------------|----------------------------------------------|
| Empirical formula                          | $C_{12}H_{10}Co_2K_5Na_4O_{109}P_6W_{24}$    |
| Formula weight                             | 6901.74                                      |
| Temperature / K                            | 150.0                                        |
| Crystal system                             | monoclinic                                   |
| Space group                                | $C2/m$                                       |
| a[Å]                                       | 35.2452(9)                                   |
| b[Å]                                       | 21.1687(5)                                   |
| c[Å]                                       | 21.4434(4)                                   |
| $\alpha$ [Å]                               | 90                                           |
| $\beta$ [Å]                                | 90.1220(9)                                   |
| $\gamma$ [Å]                               | 90                                           |
| V[Å <sup>3</sup> ]                         | 15998.8(6)                                   |
| Z                                          | 4                                            |
| $\rho_{\text{calcd}}$ [g/cm <sup>3</sup> ] | 2.865                                        |
| $\mu$ [mm <sup>-1</sup> ]                  | 17.658                                       |
| F (000)                                    | 12052.0                                      |
| Index ranges                               | -42 ≤ h ≤ 41<br>-25 ≤ k ≤ 24<br>-25 ≤ l ≤ 25 |
| Reflections collected                      | 52886                                        |
| Independent reflections                    | 14645 [Rint = 0.0595, Rsigma = 0.0663]       |
| data/restraints/parameters                 | 14645/121/757                                |
| Goodness-of-fit on F2                      | 0.995                                        |
| R1, wR2 [I > 2σ(I)]                        | 0.0845, 0.2179                               |
| R1, wR2 [all data]                         | 0.0978, 0.2356                               |

---

**Table S4.** Bond length of compound **1**.

| Bond                  | Bond length | Bond                 | Bond length | Bond    | Bond length |
|-----------------------|-------------|----------------------|-------------|---------|-------------|
| W1-O7                 | 1.823(16)   | W2-O2                | 1.847(14)   | W3-O9   | 2.298(13)   |
| W1-O8                 | 2.128(13)   | W2-O3                | 1.968(12)   | W3-O14  | 1.896(11)   |
| W1-O14                | 1.936(13)   | W2-O5                | 2.127(11)   | W3-O21  | 1.948(14)   |
| W1-O18                | 1.749(13)   | W2-O28               | 1.731(12)   | W3-O26  | 1.701(16)   |
| W1-O35                | 1.934(11)   | W2-O31               | 1.954(12)   | W3-O27  | 1.934(13)   |
| W1-O40                | 1.910(4)    | W2-O41               | 1.909(4)    | W3-O42  | 1.904(3)    |
| W4-O3                 | 1.877(12)   | W5-O6                | 2.013(16)   | W6-O4   | 1.987(16)   |
| W4-O9                 | 2.310(12)   | W5-O11               | 1.934(12)   | W6-O11  | 1.943(12)   |
| W4-O19                | 1.945(13)   | W5-O19               | 1.865(15)   | W6-O21  | 1.865(15)   |
| W4-O23                | 1.710(14)   | W5-O24               | 2.277(11)   | W6-O24  | 2.303(12)   |
| W4-O27                | 1.910(13)   | W5-O31               | 1.899(13)   | W6-O34  | 1.727(14)   |
| W4-O50                | 1.920(6)    | W5-O46               | 1.725(14)   | W6-O35  | 1.905(11)   |
| W7-O4                 | 1.838(16)   | W8-O2                | 1.960(14)   | W9-O7   | 1.984(16)   |
| W7-O15                | 1.954(12)   | W8-O10               | 1.808(14)   | W9-O13  | 2.157(11)   |
| W7-O17                | 1.832(12)   | W8-O12               | 2.169(12)   | W9-O17  | 2.096(13)   |
| W7-O20                | 2.307(12)   | W8-O16               | 2.116(14)   | W9-O25  | 1.779(14)   |
| W7-O33                | 2.10(2)     | W8-O36               | 1.939(16)   | W9-O29  | 1.914(17)   |
| W7-O45                | 1.721(12)   | W8-O37               | 1.732(13)   | W9-O38  | 1.733(13)   |
| W10-O6                | 1.807(16)   | W11-O29              | 1.914(15)   | W12-O22 | 1.81(2)     |
| W10-O15               | 1.928(12)   | W11-O32              | 2.049(18)   | W12-O30 | 2.050(17)   |
| W10-O16               | 1.812(13)   | W11-O33              | 1.78(2)     | W12-O36 | 1.899(14)   |
| W10-O20               | 2.299(12)   | W11-O39              | 2.274(14)   | W12-O39 | 2.263(12)   |
| W10-O22               | 2.08(2)     | W11-O44              | 1.975(19)   | W12-O44 | 1.929(16)   |
| W10-O43               | 1.748(13)   | W11-O51              | 1.733(16)   | W12-O47 | 1.718(16)   |
| Co1-O1W <sup>1</sup>  | 2.078(18)   | Co2-O4W <sup>1</sup> | 2.105(18)   | P1-O5   | 1.516(13)   |
| Co1-O1W               | 2.078(18)   | Co2-O4W              | 2.105(18)   | P1-O8   | 1.526(12)   |
| Co1-O2W               | 2.02(3)     | Co2-O5W              | 2.04(3)     | P1-O9   | 1.547(15)   |
| Co1-O10               | 2.005(15)   | Co2-O251             | 2.039(16)   | P1-O24  | 1.523(13)   |
| Co1-O10 <sup>1</sup>  | 2.005(15)   | Co2-O25              | 2.039(16)   | P2-O12  | 1.509(13)   |
| Co1B-O2W              | 1.85(3)     | Co2B-O5W             | 1.79(3)     | P2-O13  | 1.513(12)   |
| Co1B-O3W              | 2.21(3)     | Co2B-O6W             | 2.21(4)     | P2-O20  | 1.535(14)   |
| Co1B-O10              | 2.098(16)   | Co2B-O251            | 2.097(16)   | P2-O39  | 1.579(15)   |
| Co1B-O10 <sup>1</sup> | 2.098(16)   | Co2B-O25             | 2.097(16)   | P3-O30  | 1.549(16)   |
| P3-O32                | 1.565(18)   | P3-O48               | 1.544(15)   | P3-C1   | 1.78(2)     |

**Table S5.** Angles of compound **1**.

| Bond      | Angle    | Bond      | Angle    | Bond      | Angle    |
|-----------|----------|-----------|----------|-----------|----------|
| O7-W1-O8  | 85.2(5)  | O2-W2-O3  | 166.7(5) | O2-W3-O9  | 82.1(5)  |
| O7-W1-O14 | 166.3(5) | O2-W2-O5  | 85.8(5)  | O2-W3-O21 | 83.7(6)  |
| O7-W1-O35 | 92.9(6)  | O2-W2-O31 | 92.0(6)  | O2-W3-O27 | 154.5(6) |

|           |          |           |          |           |          |
|-----------|----------|-----------|----------|-----------|----------|
| O7-W1-O40 | 91.5(8)  | O2-W2-O41 | 91.7(7)  | O2-W3-O42 | 90.5(7)  |
| O7-W1-O8  | 81.7(5)  | O2-W2-O5  | 81.5(5)  | O2-W3-O9  | 81.0(5)  |
| O7-W1-O7  | 100.0(6) | O2-W2-O2  | 98.8(6)  | O2-W3-O9  | 172.6(6) |
| O7-W1-O8  | 174.8(6) | O2-W2-O3  | 93.9(6)  | O2-W3-O14 | 105.0(6) |
| O7-W1-O14 | 93.1(6)  | O2-W2-O5  | 175.3(6) | O2-W3-O21 | 97.5(7)  |
| O7-W1-O35 | 94.8(6)  | O2-W2-O31 | 93.9(6)  | O2-W3-O27 | 100.2(6) |
| O7-W1-O40 | 96.7(7)  | O2-W2-O41 | 98.4(7)  | O2-W3-O42 | 97.3(8)  |
| O7-W1-O8  | 84.9(5)  | O2-W2-O3  | 83.1(6)  | O2-W3-O9  | 72.6(5)  |
| O7-W1-O14 | 82.1(6)  | O2-W2-O5  | 84.7(5)  | O2-W3-O21 | 89.4(6)  |
| O7-W1-O8  | 83.1(6)  | O2-W2-O3  | 90.5(7)  | O2-W3-O9  | 84.5(7)  |
| O7-W1-O14 | 90.8(8)  | O2-W2-O5  | 82.6(6)  | O2-W3-O21 | 165.0(8) |
| O7-W1-O35 | 166.8(6) | O2-W2-O31 | 166.4(7) | O2-W3-O27 | 90.0(7)  |
| O2-W4-O9  | 82.9(5)  | O2-W5-O24 | 83.0(5)  | O2-W6-O24 | 83.1(5)  |
| O2-W4-O19 | 84.1(6)  | O2-W5-O6  | 83.0(5)  | O2-W6-O4  | 88.8(6)  |
| O2-W4-O27 | 155.5(6) | O2-W5-O24 | 83.0(5)  | O2-W6-O24 | 73.1(5)  |
| O2-W4-O50 | 92.3(8)  | O2-W5-O6  | 83.0(5)  | O2-W6-O4  | 164.2(6) |
| O2-W4-O9  | 81.6(5)  | O2-W5-O11 | 83.0(5)  | O2-W6-O11 | 91.7(6)  |
| O2-W4-O3  | 105.1(7) | O2-W5-O24 | 83.0(5)  | O2-W6-O24 | 81.9(5)  |
| O2-W4-O9  | 171.6(6) | O2-W5-O31 | 83.0(5)  | O2-W6-O35 | 85.1(6)  |
| O2-W4-O19 | 96.7(7)  | O2-W5-O6  | 83.0(5)  | O2-W6-O4  | 96.8(7)  |
| O2-W4-O27 | 99.2(7)  | O2-W5-O11 | 83.0(5)  | O2-W6-O11 | 98.5(6)  |
| O2-W4-O50 | 96.2(9)  | O2-W5-O24 | 83.0(5)  | O2-W6-O21 | 98.8(7)  |
| O2-W4-O9  | 72.7(5)  | O2-W5-O6  | 83.0(5)  | O2-W6-O24 | 171.7(5) |
| O2-W4-O19 | 89.9(6)  | O2-W5-O11 | 83.0(5)  | O2-W6-O35 | 102.7(6) |
| O2-W4-O50 | 88.3(8)  | O2-W5-O19 | 83.0(5)  | O2-W6-O4  | 88.7(6)  |
| O2-W4-O9  | 85.7(8)  | O2-W5-O24 | 83.0(5)  | O2-W6-O11 | 158.7(6) |
| O2-W4-O19 | 167.1(8) | O2-W5-O31 | 83.0(5)  | O2-W6-O24 | 85.6(5)  |
| O2-W7-O15 | 91.2(6)  | O2-W8-O12 | 83.7(5)  | O2-W9-O13 | 84.1(5)  |
| O2-W7-O20 | 87.5(5)  | O2-W8-O16 | 83.1(5)  | O2-W9-O17 | 83.1(5)  |
| O2-W7-O33 | 169.6(5) | O2-W8-O2  | 97.3(5)  | O2-W9-O13 | 80.7(5)  |
| O2-W7-O20 | 71.3(5)  | O2-W8-O12 | 88.3(6)  | O2-W9-O7  | 97.6(6)  |
| O2-W7-O33 | 84.4(6)  | O2-W8-O16 | 168.5(6) | O2-W9-O13 | 88.8(6)  |
| O2-W7-O4  | 95.5(6)  | O2-W8-O36 | 94.8(6)  | O2-W9-O17 | 169.3(6) |
| O2-W7-O15 | 154.2(6) | O2-W8-O12 | 80.4(5)  | O2-W9-O29 | 95.3(7)  |
| O2-W7-O20 | 84.2(5)  | O2-W8-O2  | 162.1(6) | O2-W9-O7  | 161.4(6) |
| O2-W7-O33 | 84.7(6)  | O2-W8-O12 | 83.6(6)  | O2-W9-O13 | 82.8(6)  |
| O2-W7-O20 | 82.2(5)  | O2-W8-O16 | 82.4(6)  | O2-W9-O17 | 81.7(6)  |
| O2-W7-O4  | 98.7(6)  | O2-W8-O2  | 95.8(7)  | O2-W9-O7  | 94.7(7)  |
| O2-W7-O15 | 100.7(6) | O2-W8-O10 | 100.9(7) | O2-W9-O13 | 170.9(6) |
| O2-W7-O17 | 102.8(6) | O2-W8-O12 | 170.9(6) | O2-W9-O17 | 90.2(6)  |
| O2-W7-O20 | 170.1(6) | O2-W8-O16 | 90.5(6)  | O2-W9-O25 | 100.3(6) |

|                                        |          |                                         |           |                                         |           |
|----------------------------------------|----------|-----------------------------------------|-----------|-----------------------------------------|-----------|
| O2-W7-O33                              | 91.4(7)  | O2-W8-O36                               | 94.8(7)   | O2-W9-O29                               | 96.1(7)   |
| O2-W10-O15                             | 91.4(6)  | O2-W11-O32                              | 87.6(7)   | O2-W12-O30                              | 162.9(6)  |
| O2-W10-O16                             | 95.1(6)  | O2-W11-O39                              | 83.6(5)   | O2-W12-O36                              | 93.1(7)   |
| O2-W10-O20                             | 87.2(5)  | O2-W11-O44                              | 156.7(6)  | O2-W12-O39                              | 85.8(6)   |
| O2-W10-O22                             | 169.7(5) | O2-W11-O39                              | 77.8(6)   | O2-W12-O44                              | 91.2(7)   |
| O2-W10-O20                             | 71.9(5)  | O2-W11-O29                              | 92.1(8)   | O2-W12-O39                              | 77.2(5)   |
| O2-W10-O22                             | 84.3(6)  | O2-W11-O32                              | 163.7(6)  | O2-W12-O30                              | 86.2(7)   |
| O2-W10-O15                             | 154.4(6) | O2-W11-O39                              | 86.0(6)   | O2-W12-O39                              | 83.4(5)   |
| O2-W10-O20                             | 83.7(5)  | O2-W11-O44                              | 91.2(7)   | O2-W12-O44                              | 157.4(6)  |
| O2-W10-O22                             | 85.1(6)  | O2-W11-O32                              | 83.0(7)   | O2-W12-O30                              | 83.4(7)   |
| O2-W10-O20                             | 82.6(5)  | O2-W11-O39                              | 73.7(5)   | O2-W12-O39                              | 74.8(6)   |
| O2-W10-O6                              | 98.8(7)  | O2-W11-O29                              | 102.4(7)  | O2-W12-O22                              | 105.1(8)  |
| O2-W10-O15                             | 99.9(6)  | O2-W11-O32                              | 93.6(8)   | O2-W12-O30                              | 91.7(8)   |
| O2-W10-O16                             | 103.5(6) | O2-W11-O33                              | 102.4(8)  | O2-W12-O36                              | 102.4(7)  |
| O2-W10-O20                             | 170.1(6) | O2-W11-O39                              | 169.4(7)  | O2-W12-O39                              | 167.3(7)  |
| O2-W10-O22                             | 91.1(7)  | O2-W11-O44                              | 99.4(7)   | O2-W12-O44                              | 97.9(8)   |
| O1W <sup>1</sup> -Co1-O1W              | 93.4(13) | O1W <sup>1</sup> -Co1B-O3W              | 162.2(13) | O1W <sup>1</sup> -Co2-O25 <sup>1</sup>  | 92.1(7)   |
| O1W <sup>1</sup> -Co1-O1W              | 91.4(9)  | O1W <sup>1</sup> -Co1B-O10 <sup>1</sup> | 96.6(9)   | O1W <sup>1</sup> -Co2-O4W               | 174.8(8)  |
| O1W <sup>1</sup> -Co1-O1W <sup>1</sup> | 91.4(9)  | O1W <sup>1</sup> -Co1B-O10              | 96.6(9)   | O1W <sup>1</sup> -Co2-O4W <sup>1</sup>  | 85.8(8)   |
| O1W <sup>1</sup> -Co1-O1W <sup>1</sup> | 87.1(7)  | O1W <sup>1</sup> -Co1B-O3W              | 96.4(8)   | O1W <sup>1</sup> -Co2-O4W               | 174.8(8)  |
| O1W <sup>1</sup> -Co1-O1W              | 87.1(7)  | O1W <sup>1</sup> -Co1B-O3W              | 96.4(8)   | O1W <sup>1</sup> -Co2-O4W <sup>1</sup>  | 85.8(8)   |
| O1W <sup>1</sup> -Co1-O1W              | 174.2(8) | O1W <sup>1</sup> -Co1B-O10              | 86.8(10)  | O1W <sup>1</sup> -Co2-O25 <sup>1</sup>  | 92.3(9)   |
| O1W <sup>1</sup> -Co1-O1W <sup>1</sup> | 174.2(8) | O1W <sup>1</sup> -Co2-O4W               | 95.7(14)  | O1W <sup>1</sup> -Co2B-O6W              | 160.1(13) |
| O1W <sup>1</sup> -Co1-O2W              | 94.4(7)  | O1W <sup>1</sup> -Co2-O4W               | 92.9(8)   | O1W <sup>1</sup> -Co2B-O25              | 97.7(9)   |
| O1W <sup>1</sup> -Co1-O2W              | 94.4(7)  | O1W <sup>1</sup> -Co2-O4W <sup>1</sup>  | 92.9(8)   | O1W <sup>1</sup> -Co2B-O25 <sup>1</sup> | 97.7(9)   |
| O1W <sup>1</sup> -Co1-O10 <sup>1</sup> | 91.9(8)  | O1W <sup>1</sup> -Co2-O25               | 92.1(7)   | O1W <sup>1</sup> -Co2B-O6W              | 96.4(8)   |
| O1W <sup>1</sup> -Co2B-O6W             | 96.4(8)  | O1W <sup>1</sup> -Co2B-O25 <sup>1</sup> | 89.1(9)   |                                         |           |

## Reference

- 1 W. Chen, H. Li, J. Song, Y. Zhao, P. Ma, J. Niu, J. Wang, *Inorg. Chem.*, 2022, **61**, 2076–2085.
- 2 D. Zhang, Z. Liang, S. Xie, P. Ma, C. Zhang, J. Wang, J. Niu, *Inorg. Chem.*, 2014, **53**, 9917–9922.
- 3 T. He, Y.-Z. Zhang, H. Wu, X.-J. Kong, X.-M. Liu, L.-H. Xie, Y. Dou, J.-R. Li, *ChemPhysChem.*, 2017, **18**, 3245–3252.
- 4 Z. Zhu, L. Lin, J. Zhang, X. Li, Y. Sun, S. Zheng, *Inorg. Chem. Front.*, 2020, **7**, 3919–3924.
- 5 Z. Liu, X. Zhang, R. Wan, H. Li, Y. Hong, P. Ma, J. Niu, J. Wang, *Chem. Commun.*, 2021, **57**, 10250–10253.
- 6 Y.-Q. Jiao, H.-Y. Zang, X.-L. Wang, E.-L. Zhou, B. -Q. Song, C.-G. Wang, K.-Z. Shao, Z.-M. Su, *Chem. Commun.*, 2015, **51**, 11313–11316.
- 7 G.-J. Cao, J.-D. Liu, T.-T. Zhuang, X.-H. Cai, S.-T. Zheng, *Chem. Commun.*, 2015, **51**, 2048–2051.
- 8 E.-L. Zhou, C. Qin, P. Huang, X.-L. Wang, W.-C. Chen, K.-Z. Shao, Z.-M. Su, *Chem. Eur. J.*, 2015, **21**, 11894–11898.
- 9 J. Lai, X. Duan, H. Yang, M. Wei, *J. Coord. Chem.*, 2018, **71**, 1469–1483.
- 10 J.-H. Liu, R.-T. Zhang, J. Zhang, D. Zhao, X.-X. Li, Y.-Q. Sun, S.-T. Zheng, *Inorg. Chem.*, 2019, **58**, 14734–14740.
- 11 P. Ma, R. Wan, Y. Wang, F. Hu, D. Zhang, J. Niu, J. Wang, *Inorg. Chem.*, 2016, **55**, 918–924.
- 12 M. Yang, H. Li, Y. Zhang, S. Ji, W. Chen, P. Ma, J. Wang, J. Niu, *Inorg. Chem.*, 2023, **62**, 6467–6473.
